# Supplementary material for: Prevalence of Shiga Toxin-Producing Escherichia coli O157 in Wild Scottish Deer with High Human Pathogenic Potential
Source: MDPI journal article supplement (doi:10.3390/ani13172795), 2023-09-02
Supplement: s1 [file s1]

**Supplementary Table S1** Number of deer culled by FLS in 2016/2017 by month and species.

| <b>Month</b> | <b>Overall</b> | <b>Fallow Deer</b> | <b>Red Deer</b> | <b>Red/Sika Deer (Hybrid)*</b> | <b>Roe Deer</b> | <b>Sika Deer</b> |
|--------------|----------------|--------------------|-----------------|--------------------------------|-----------------|------------------|
| April        | 567            | 1                  | 194             | 0                              | 333             | 39               |
| May          | 1713           | 10                 | 559             | 1                              | 1051            | 92               |
| June         | 1217           | 9                  | 358             | 2                              | 761             | 87               |
| July         | 832            | 3                  | 322             | 0                              | 437             | 70               |
| August       | 291            | 1                  | 96              | 0                              | 179             | 15               |
| September    | 793            | 3                  | 384             | 0                              | 142             | 264              |
| October      | 5403           | 72                 | 2416            | 3                              | 2432            | 480              |
| November     | 4635           | 98                 | 1883            | 1                              | 2259            | 394              |
| December     | 2965           | 57                 | 925             | 1                              | 1729            | 253              |
| January      | 3476           | 64                 | 1288            | 1                              | 1873            | 250              |
| February     | 3324           | 66                 | 1248            | 0                              | 1734            | 276              |
| March        | 3634           | 77                 | 1164            | 0                              | 2043            | 350              |

\*reported by the stalker based on deer appearance.

**Supplementary Table S2** Comparison of deer species sampled in this study with proportion culled by FLS in 2016/2017

| Species | Deer species culled by FLS <sup>#</sup><br>(2016/2017) |      | Deer species culled and sampled in<br>this study (2017/2018) |      |
|---------|--------------------------------------------------------|------|--------------------------------------------------------------|------|
|         | N*                                                     | %    | N*                                                           | %    |
| Red     | 10,837                                                 | 37.6 | 498                                                          | 46.0 |
| Roe     | 14,973                                                 | 51.9 | 449                                                          | 41.5 |
| Fallow  | 461                                                    | 1.6  | 115                                                          | 1.9  |
| Sika    | 2,570                                                  | 8.9  | 21                                                           | 10.6 |

\*hybrid deer were reported in the historical data (n=9) but are not included in the table above.

<sup>#</sup>FLS = Forestry and Land Scotland

### **Supplementary Material S1: Sample size calculation**

Sample size for the study was estimated using the following formula:

$$n = (z^2 \times p(1 - p))/d^2$$

where:

$n$ = sample size

$z=1.96$  (z statistic for 95% level of Confidence)

$p$ =prevalence estimate (here  $p=0.01$ )

$d$ = precision, estimated as  $p/2$  (here  $d=0.005$ )

## **Supplementary Material S2: Deer sampling strategy**

In total, 800 sample packs were distributed to Scottish deer management groups (DMGs) and 1088 sample packs were distributed to 18 Forestry and Land Scotland (FLS) ladders. The distribution of DMGs (red dots) and FLS ladders (pie charts) are indicated in the figure below. FLS ladders chosen for this study are designated with a white asterisk. Sampling from FLS ladders was weighted for species, sex, month, and ladder size. Sampling targeted three large ladders (>600 carcasses/year) and three small ladders (<600 carcasses/year) from the north and central regions of Scotland, and four large ladders and two small ladders for the Southern region of Scotland.

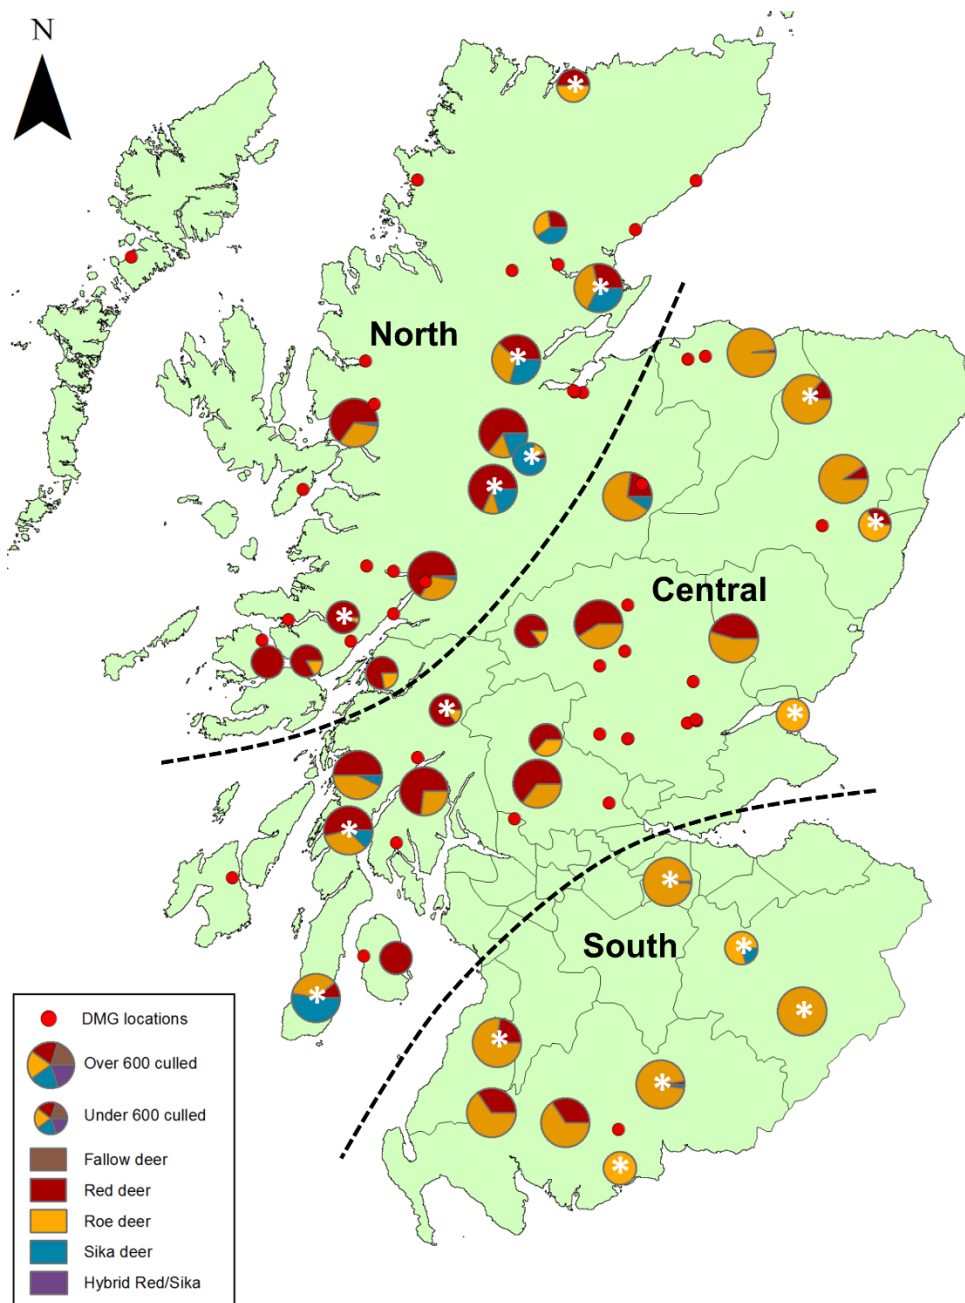

**Supplementary Material S3: Questionnaire completed by deer stalkers at time of sample collection.**

**Scottish Deer Health Survey  
2017-2019**

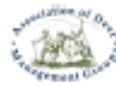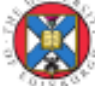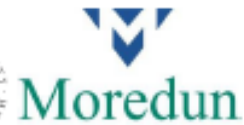

## QUESTIONNAIRE

|                                                    |                                                                                                                                                                                             |
|----------------------------------------------------|---------------------------------------------------------------------------------------------------------------------------------------------------------------------------------------------|
| Date                                               |                                                                                                                                                                                             |
| Time                                               |                                                                                                                                                                                             |
| Tag number<br>(if available)                       |                                                                                                                                                                                             |
| OS Reference of cull site                          | OS Sheet: _____<br>6-digit grid reference: _____                                                                                                                                            |
| Larder Address                                     |                                                                                                                                                                                             |
| Deer species                                       | Red <input type="checkbox"/> Roe <input type="checkbox"/> Sika <input type="checkbox"/> Other <input type="checkbox"/><br><br>If other provide details: _____                               |
| Gender                                             | Male <input type="checkbox"/> Female <input type="checkbox"/>                                                                                                                               |
| Condition Score                                    | 1 <input type="checkbox"/> 2 <input type="checkbox"/> 3 <input type="checkbox"/> 4 <input type="checkbox"/> 5 <input type="checkbox"/><br>1 = very poor condition; 5 = 'very good condition |
| Estimated age                                      | _____ years                                                                                                                                                                                 |
| Shared range with other livestock/ wild herbivores | Cattle <input type="checkbox"/> Sheep <input type="checkbox"/> Wild herbivores <input type="checkbox"/><br><br>If wild herbivores provide details below:<br><br>_____                       |
| Other comments                                     |                                                                                                                                                                                             |

**THANK-YOU FOR PARTICIPATING IN THIS SURVEY**

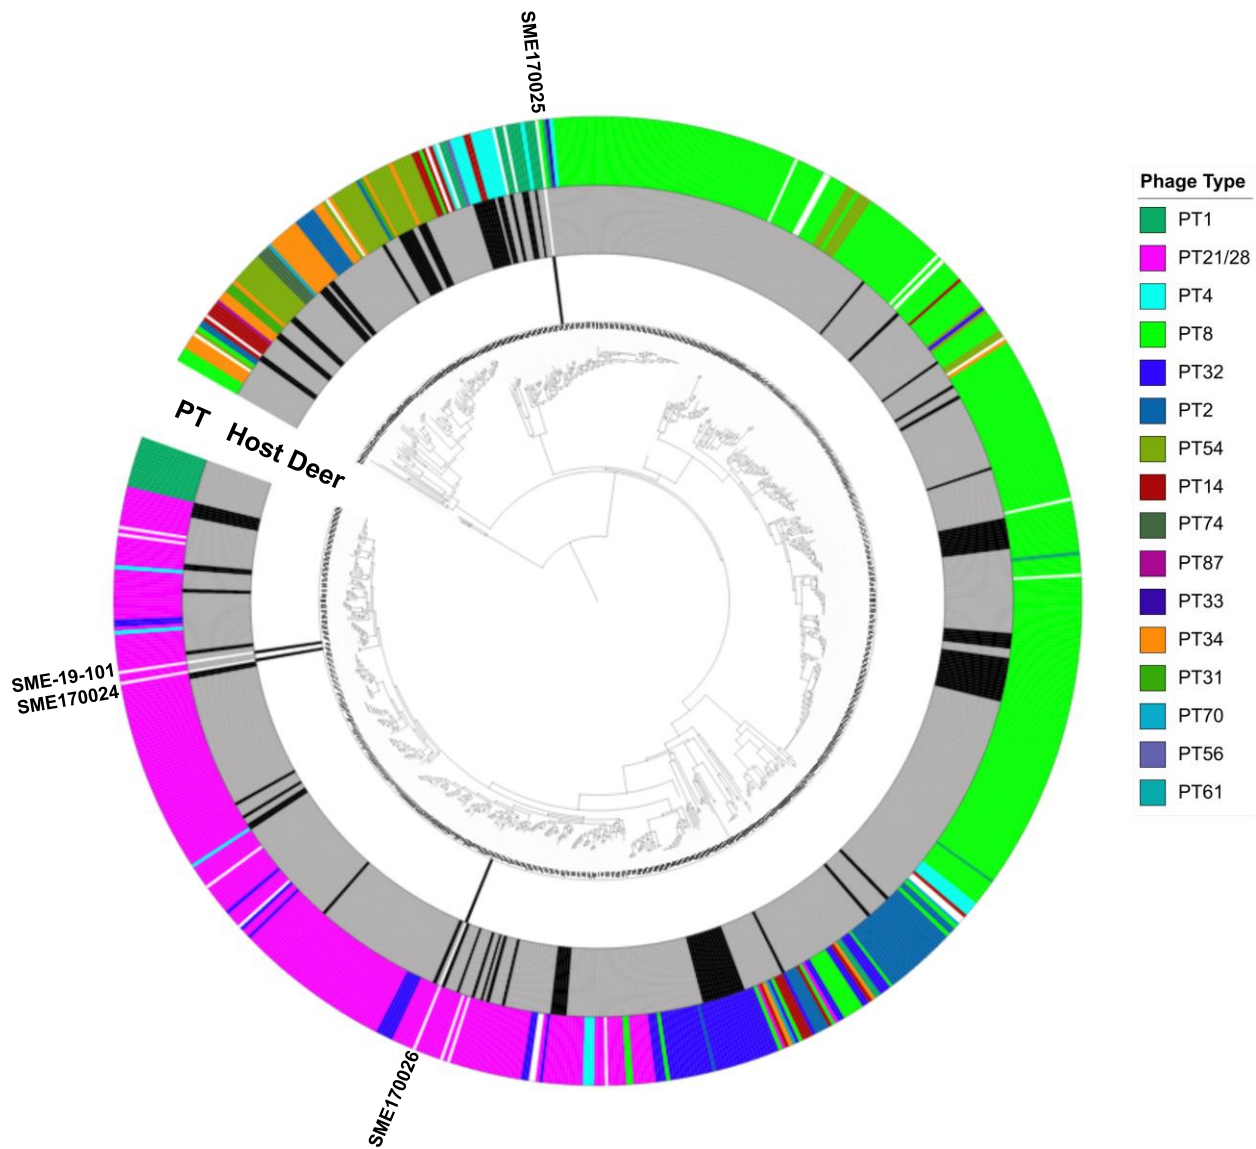

**Supplementary Figure S1. Core genome phylogenetic analysis of STEC O157 strains from Scottish wild deer.** Whole genome sequences of UK human, bovine and Scottish wild deer STEC O157 strains were used to generate the phylogeny. The phage type (PT) of each strain is shown in the outer ring. White bands indicate deer STEC O157 strains and strains that reacted with phage but did not conform (RDNC), were untypable or for which no PT information was available. Host species from which strains were isolated are shown in the middle ring (Cattle (black), Human (grey)) and inner rings deer (black). Strain identifiers for Scottish wild deer strains from this study and the 2015 venison outbreak are indicated.
