# Supplementary material for: Prevalence of Shiga Toxin-Producing Escherichia coli O157 in Wild Scottish Deer with High Human Pathogenic Potential
Source: Animals (Basel). 2023 Sep 2;13(17):2795. doi: 10.3390/ani13172795 (PMC10486872; doi:10.3390/ani13172795)
Supplement: Supplementary file 1 [file animals-13-02795-s001.zip › Supplementary Table S3.xlsx]

## Sheet: Supplementary Table S3
Project ID	ID	NCBI Accession	Date	Phage Type1	SMiRL_KmerID_Species	SMiRL_O	SMiRL_H	SMiRL_eae	SMiRL_Stx Subtype	SMiRL_MLST Profile	SMiRL_ST	SNP Address2	Predicted O serotype	Predicted H serotype	Predicted pathotype	Average Quality	Average Read Coverage	N50 (>300bp)	Number of Contigs	Length	Core Percent3	astA	eae	espA	espB	tir	ehxA	katP	espP	etpD	espF	H7-FliC	hlyD	iha	iss	nleA	nleB	nleC	toxB	espJ	gad	tccP	cba	cif	efa1	lpfA	TraT	espC	celb
9	SME170027	SRR25865689	2017-09-06	RDNC	escherichia	O157	H42	-	-	10,11,4,12,869,7,2	9985	-	O157	H42	n/a	36	111	147707	82	4754039	98	0	0	0	0	0	0	0	0	0	0	0	0	0	0	0	0	0	0	0	99.74	0	94.49	0	0	99.83	0	0	0
63	SME170028	SRR25865688	2017-09-25	RDNC	escherichia	O157	H43	-	-	6,4,14,16,24,8,14	155	-	O157	H43	n/a	36	110	193380	307	5231530	98	0	0	0	0	0	0	0	0	0	0	0	0	0	0	0	0	0	0	0	99.5	0	0	0	0	100	97.54	0	100
192	SME170029	SRR25865687	2017-10-10	RDNC	escherichia	O157	H43	-	-	6,4,14,16,24,8,14	155	-	O157	H43	n/a	36	116	193455	160	4957039	98	0	0	0	0	0	0	0	0	0	0	0	0	0	0	0	0	0	0	0	99.5	0	0	0	0	100	97.95	0	0
215	SME170024	SRR25865699	2017-10-13	21/28	escherichia	O157	H7	eae	stx2a-stx2c	12,12,8,12,15,2,2	11	4.4.4.955.4002.4229.7925	O157	H7	STEC	35	133	148782	312	5369702	98	100	100	100	99.89	100	100	99.95	99.97	100	100	100	100	100	97.96	100	100	92.04	99.96	100	99.86	99.64	0	0	0	0	0	0	96.53
300	SME170025	SRR25865698	2017-10-19	8	escherichia	O157	H7	eae	stx2a	12,12,8,12,15,2,2	11	18.35.380.738.5863.6442.7926	O157	H7	STEC	36	106	157850	390	5455898	97	91.3	100	100	100	99.94	100	100	99.97	100	100	100	100	100	98.3	100	99.9	100	99.95	100	98.06	100	0	0	0	0	0	0	100
612	SME170026	SRR25865697	2017-12-12	21/28	escherichia	O157	H7	eae	stx2a	12,12,8,12,15,2,2	11	4.4.4.4313.5862.6441.7924	O157	H7	STEC	36	93	146894	384	5422620	96	91.3	100	100	99.89	100	100	100	99.97	100	100	100	100	100	97.96	100	100	100	99.96	98.62	100	98.7	0	0	0	0	0	0	100
640	SME170030	SRR25865696	2017-12-17	RDNC	escherichia	O157	H39	eae	-	76,24,13,97,23,76,79	1041	-	O157	H39	EPEC	35	110	192602	85	4608473	98	0	92.52	93.37	0	98.85	0	0	0	0	99.36	0	0	0	0	0	100	0	0	95.11	98.47	0	0	100	0	0	0	99.97	100
691	SME170031	SRR25865695	2018-01-10	21/28	escherichia	O157	H7	eae	-	12,12,8,12,15,2,2	11	-	O157	H7	EPEC	32	63	162125	195	5376041	97	91.3	100	100	100	99.76	100	0	0	100	99.07	100	99.93	0	98.3	100	100	100	0	99.85	99.93	99.87	0	0	99.99	0	98.09	0	0
1 RDNC, reaction does not conform
2 SNP Address only determined for STEC O157
3 Core percent: % loci found belonging to the subset of 2513 core loci.
Data from BioNumerics are highlighted in orange; virulence gene values provided are % identity
Data from the Scottish Microbiology Reference Laboratory WGS Pipeline (SMiRLWBP) are highlighted in yellow
[truncated: 1 more columns]
